# Supplementary material
Source: Springer Nature journal article supplement (https://www.springermedizin.de/resource/supplementary/12885_2013_4252_MOESM8_ESM.pdf/9467604)
Supplement: MOESM8 [file 9467604]

**A****Disease specific survival**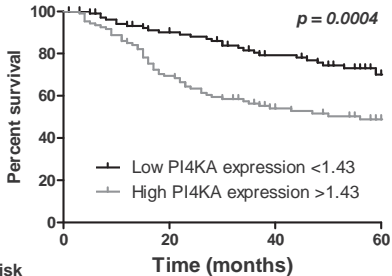

Numbers at risk

|             |     |    |    |    |
|-------------|-----|----|----|----|
| Low PI4KA : | 107 | 88 | 68 | 45 |
| HighPI4KA : | 107 | 72 | 45 | 33 |

**B****Recurrence-free survival**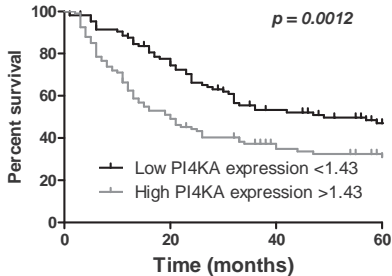

|             |     |    |    |    |
|-------------|-----|----|----|----|
| Low PI4KA : | 107 | 76 | 48 | 31 |
| HighPI4KA : | 107 | 53 | 31 | 22 |
